# Supplementary material for: Disabling of ARC1 through CRISPR–Cas9 leads to a complete breakdown of self-incompatibility responses in Brassica napus
Source: PubMed Central journal article supplement (PMC10030360; doi:10.1016/j.xplc.2022.100504), 2022-12-14
Supplement: mmc1.pdf [file mmc1.pdf]

**Plant Communications, Volume 4**

**Supplemental information**

**Disabling of ARC1 through CRISPR–Cas9 leads to a complete breakdown of self-incompatibility responses in *Brassica napus***

**Kumar Abhinandan, Neil M.N. Hickerson, Xingguo Lan, and Marcus A. Samuel**

1 **Supplemental Information**

2

3 **Disabling of ARC1 through CRISPR/CAS9 leads to a complete breakdown of self-**  
4 **incompatibility responses in *Brassica napus***

5

6 Kumar Abhinandan <sup>1,2</sup>, Neil M.N. Hickerson<sup>1</sup>, Xingguo Lan<sup>3</sup> and Marcus A. Samuel<sup>1</sup>

7

8 \*Correspondence: [msamuel@ucalgary.ca](mailto:msamuel@ucalgary.ca)

9

10 **Affiliations:**

11 <sup>1</sup>University of Calgary, Department of Biological Sciences, 2500 University Drive. NW,  
12 Calgary. Alberta T2N 1N4, Calgary, Canada

13 <sup>2</sup>20/20 Seed Labs Inc., Nisku, Alberta, T9E 7N5, Canada

14 <sup>3</sup>Key Laboratory of Saline-Alkali Vegetation Ecology Restoration, Ministry of Education,  
15 College of Life Sciences, Northeast Forestry University, Harbin 150040, China.

16

17

18

19

20

21

22

23

24

25

26

27

28

29

30

31

32

33

34

35

36

37

38

39

40 **RNA isolation, cDNA synthesis and qPCR of ARC1 and PUB17**

41  
42 Total RNA was isolated from the stigma of *Brassica napus* flowers using TRIzol™  
43 Reagent (Invitrogen™) using the manufacturer's protocol and after quantification and  
44 DNase treatment, a total of 2 µg of RNA was aliquoted for cDNA synthesis using the  
45 manufacturer's instructions (Applied Biosystems™). One microgram of cDNA was then  
46 used for quantitative PCR (qPCR) of the *ARC1* and *PUB17* genes.

47  
48 **CRISPR/Cas9 targeting *BnARC1*: determination of the target site and design of the**  
49 **construct**

50  
51 To generate target sites for the CRISPR/Cas9 system, the CRISPR multi-targeter tool  
52 (<http://www.multicrispr.net/>) was used. This tool uses the input gene sequence to  
53 generate target sites that meet the appropriate requirements for Cas9, such as proximity  
54 to a protospacer adjacent motif (PAM) site (NGG) (Paul and Qi, 2016). The list of potential  
55 gRNA sequences with 45% or higher GC content was selected. It was further narrowed  
56 down to find guides with the fewest possible off-targets using the Cas-OFFinder tool  
57 (<http://www.rgenome.net/cas-offinder/>).

58 The five gRNAs designed to target endogenous *BnARC1* were synthesized into a  
59 multiplex construct and cloned into a plasmid that already contained the Cas9 coding  
60 sequence under a single CaMV35S promoter control. The five multiplexed gRNAs were  
61 each placed its own U3 or U6 promoter. The Cas9 coding sequence was derived from  
62 *Streptococcus pyogenes* and optimized for plant codons. This type of multiplexed system  
63 was previously shown to be effective in generating double-stranded DNA breaks in canola  
64 (Stanic et al., 2021).

65

66

67 ***In vitro* Cas9 digestion of BnARC1 using designed targets**

68  
69 Targets designed for *BnARC1* were tested *in vitro* for their targeting capabilities. The  
70 gRNA sequence was amplified using high-fidelity Q5 DNA polymerase from a plasmid  
71 containing the guides. Scaffold RNA from the amplicon was then transcribed using a T7  
72 polymerase incubated at 37 °C for 16 hours. The digestion reaction was carried out using  
73 purified gRNA, purified Cas9 and *BnARC1* amplicons containing flanking regions of 5'  
74 and 3' to allow fragment identification on the gel (Stanic et al., 2021). The Guide-it sgRNA  
75 *in vitro* screening kit (Clontech) was used for Cas9 *in vitro* digestion. The components  
76 were incubated at 37 °C for 1 hour and then heated to 70 °C for 10 minutes for  
77 deactivation.

78  
79 **Genetic transformation of Westar and W1 hypocotyls with *Agrobacterium***  
80 ***tumefaciens* GV3101**

81  
82 The genetic transformation of canola used here is modified for Westar and W1  
83 transformation (Bhalla and Singh, 2008; Borjian and Arak, 2013). The seeds were  
84 sterilized and seeded in round plates (100 x 25) mm containing ½ MS agar (6-7  
85 seeds/plate). After stratification for 2-3 days, the plates were placed in the dark and kept  
86 at 22 °C in a vertical position to allow hypocotyl growth. Hypocotyls were cut into smaller  
87 pieces of 1 to 1.5 cm and placed on ½ MS agar plates supplemented with 2-4D (1 mg/l)  
88 for two days after which *A. tumefaciens* GV3101 harboring the construct was used to  
89 infect the cut ends and the transgenic plants were regenerated using the procedure  
90 described previously (Perkins et al., 2020).

91  
92 **Genomic DNA Isolation**

93  
94 Genomic DNA isolation was performed using chloroform based CTAB method as

95 previously described (Porebski et al., 1997; Stanic et al., 2021). Leaf tissue was ground  
96 in 250  $\mu$ L CTAB (2% CTAB, 20 mM EDTA, 100 mM Tris-HCl pH 8.0, 1.4 M NaCl + 0.2%  
97  $\beta$ -mercaptoethanol) in microcentrifuge tubes and incubated at 65  $^{\circ}$ C for 30 - 45 min.  
98 Chloroform (250  $\mu$ L) was added to the pulverized tissues and vortexed for 1 min followed  
99 by centrifugation at 12000 rpm for 5 min at RT. The supernatant was transferred to  
100 separate tubes without disturbing/aspirating the middle layer. Isopropyl alcohol (150  $\mu$ L)  
101 was added to the tubes and mixed well by vortexing the tubes. Following incubation at  
102 -20  $^{\circ}$ C, the tubes were centrifuged at 12000 rpm for 10 min at RT and all supernatant was  
103 discarded. The resulting DNA pellet was washed with 70% ethanol at 12000 rpm for 5  
104 min at RT, followed by drying the pellet for 10 - 30 min. The pellet was resuspended in  
105 double-distilled sterile water with brief tapping to dislodge (if any) DNA sticking to the  
106 walls of the microfuge tube.

### 107 **PCR, Genotyping and sequencing of Transgenic Plants for CRISPR/Cas Edits**

108  
109  
110 PCR on isolated plant DNA was performed in a 20  $\mu$ L final volume using a 2X premix  
111 from commercial vendors (VWR, Lambda biotechnology, Thermofisher). The PCR  
112 reaction (20  $\mu$ L) contained 100ng of template DNA; 20pM (0.75  $\mu$ L of 20  $\mu$ M) of each  
113 forward and reverse primers, 10 $\mu$ L of 2X PCR Master mix. Nano pure water was used to  
114 make up the volume to 20 $\mu$ L. PCR reactions were carried out on BioRad S1000<sup>TM</sup> thermal  
115 cycler with the following cycle: 1 denaturation cycle at 95  $^{\circ}$ C for 3 min, 95  $^{\circ}$ C for 30 sec,  
116 55  $^{\circ}$ C for 30 sec, 72  $^{\circ}$ C for 1 min (based on 1000bp/min extension) (Go to step 2 repeat  
117 30 times), 72  $^{\circ}$ C for 10 min. The PCR product was analyzed on 1 % agarose gel  
118 electrophoresis.

119 To identify CRISPR edits, BnARC1 was amplified using gene specific primers and edits

120 were identified using Sanger sequencing.

121

122

**Table 1: Common Primers Used in Genotyping**

123

124

125

126

127

128

129

130

131

132

133

134

135

136

137

138

139

| <b>Primer</b>                           | <b>Sequence 5' to 3'</b>     |
|-----------------------------------------|------------------------------|
| <b>For CrARC1</b>                       |                              |
| p1665 For                               | GCGATTCAAATTCGGCTGACC        |
| Cas9 Seq 379 Rev                        | TGTCCTCCTCCACGAGGAAGG        |
|                                         |                              |
| <b>For W1, Westar and Brassica rapa</b> |                              |
| S8-For                                  | TACGTTGGGTATCAGACCGGG        |
| S8-Rev                                  | GACCCCGCGGATATAATGTTTTG<br>C |
| S47-For                                 | TTAAACGGTAACTCGGGCGAG        |
| S47-Rev                                 | TTCGCATGTCTTGGGTCCGCC        |
| SRK-910-For                             | CCTACGATAGTTCTTACT           |
| SRK-910-Rev                             | CCATGATGTCCGAGTGAACGTT       |

140

### **Aniline Blue Assay**

141

142 The aniline blue assay was performed as previously described (Samuel et al., 2009). After

143 manually pollinating the stigma of W1, Westar or transgenic plant under investigation, the

144 stigmas were collected after 24 h and fixed in 3:1 ethanol: glacial acetic acid for 1 h to

145 overnight for decolorization. After this, the stigma was gently washed three times with

146 distilled water. The pistils were incubated for 1 h in 1 N NaOH at 60 °C followed by three

147 washes with distilled water and stained for 1 h with basic aniline blue (0.1 M K<sub>3</sub>PO<sub>4</sub> 0.1%

148 aniline blue) at 60 °C. The stained stigmas were mounted in 50% glycerol, and pollen

149 attachment and pollen germination were observed under the blue channel using a Leica

150 DMR epifluorescence microscope. Attached pollen grains and pollen tubes, if any, were

151 counted and subjected to statistical analysis.

152

153

154 **References:**

- 155 **Bhalla, P. L., and Singh, M. B.** (2008). Agrobacterium-mediated transformation of  
156 Brassica napus and Brassica oleracea. *Nature Protocols* **3**:181–189.
- 157 **Borjian, L., and Arak, H.** (2013). A Study on the Effect of Different Concentration of Plant  
158 Hormones ( BAP , NAA , 2 , 4-D , and Kinetin ) on Callus Induction in Brassica Napus.  
159 *Sciences-New York* **5**:519–521.
- 160 **Ma, X., Zhang, Q., Zhu, Q., Liu, W., Chen, Y., Qiu, R., Wang, B., Yang, Z., Li, H., Lin,**  
161 **Y., et al.** (2015). A Robust CRISPR/Cas9 System for Convenient, High-Efficiency  
162 Multiplex Genome Editing in Monocot and Dicot Plants. *Molecular Plant* **8**:1274–  
163 1284.
- 164 **Paul, J. W., and Qi, Y.** (2016). CRISPR/Cas9 for plant genome editing:  
165 accomplishments, problems and prospects. *Plant Cell Reports* **35**:1417–1427.
- 166 **Perkins, M., Skori, L., Hickerson, N. M. N., Jamshed, M., and Samuel, M. A.** (2020).  
167 Genetic manipulation of ABI3 confers frost-tolerant seed degreening in canola. *Plant*  
168 *Biotechnology Journal* **18**.
- 169 **Porebski, S., Bailey, L. G., and Baum, B. R.** (1997). Modification of a CTAB DNA  
170 extraction protocol for plants containing high polysaccharide and polyphenol  
171 components. *Plant Molecular Biology Reporter* 1997 15:1 **15**:8–15.
- 172 **Samuel, M. A., Chong, Y. T., Haasen, K. E., Aldea-Brydges, M. G., Stone, S. L., and**  
173 **Goring, D. R.** (2009). Cellular pathways regulating responses to compatible and self-  
174 incompatible pollen in brassica and arabidopsis stigmas intersect at exo70a1, a  
175 putative component of the exocyst complex. *Plant Cell* **21**:2655–2671.
- 176 **Stanic, M., Hickerson, N. M. N., Arunraj, R., and Samuel, M. A.** (2021). Gene-editing  
177 of the strigolactone receptor BnD14 confers promising shoot architectural changes  
178 in Brassica napus (canola). *Plant Biotechnology Journal* **19**.

180
